# Supplementary material for: Thermodynamic screening of metal-substituted MOFs for carbon capture
Source: Royal Society of Chemistry journal article supplement (doi:10.1039/c3cp50622c), 2013-01-01
Supplement: c3cp50622c.pdf [file c3cp50622c.pdf]

## Supporting Information

# Thermodynamic Screening of Metal Substituted MOFs for Carbon Capture

Hyun Seung Koh,<sup>†</sup> Malay Kumar Rana,<sup>†</sup> Jinhyung Hwang,<sup>†</sup> and Donald J. Siegel<sup>\*,†</sup>

<sup>†</sup>Mechanical Engineering Department, University of Michigan, Ann Arbor, Michigan 48109, United States.

### Contents

Table S1. Calculated cell parameters for M-DOBDC and M-HKUST-1 compared with experiments.

Table S2. Average calculated bond lengths in M-DOBDC.

Table S3. Average calculated bond lengths in M-HKUST-1.

Table S4. Tabulated ionic radii of +2 metal ions and electronegativity of the metal atoms

Table S5. Calculated bond lengths (Å) and bond angles (°) involving the MOF metal site (M) and adsorbed CO<sub>2</sub>.

Table S6. Calculated binding energies (ΔE) at 0K, zero point energies (ZPE), thermal energy contributions (TE) at 300K, and adsorption enthalpies (ΔH) at 300K for M-DOBDC and M-HKUST-1 within the LDA, PBE-GGA, DFT-D2 and revPBE-vdW methods.

Table S7. Change in the metal atom's (Δq<sub>M</sub>) and CO<sub>2</sub> molecule's partial charge (Δq<sub>CO2</sub>) upon CO<sub>2</sub> adsorption.

Figure S1. *trans*-configuration of CO<sub>2</sub> molecules in Cu-HKUST-1.

Figure S2. Calculated local geometries for the M-DOBDC SBU.

Figure S3. Calculated local geometries for the M-HKUST-1 SBU.

Figure S4. Charge density difference plots for M-DOBDC.

Figure S5. Charge density difference plots for M-HKUST-1.

Figure S6. CO<sub>2</sub> and metal LDOS for M-DOBDC. (Be, Mg, Ca, Sr, Sc, Ti, V, Cr, and Mn)

Figure S7. CO<sub>2</sub> and metal LDOS for M-DOBDC. (Fe, Co, Ni, Cu, Zn, Mo, W, Sn, and Pb)

Figure S8. CO<sub>2</sub> and metal LDOS for M-HKSUT-1. (Be, Mg, Ca, Sr, Sc, Ti, V, Cr, and Mn)

Figure S9. CO<sub>2</sub> and metal LDOS for M-HKSUT-1. (Fe, Co, Ni, Cu, Zn, Mo, W, Sn, and Pb)

Figure S10. DOS projected to the metal site for transition metals in M-DOBDC and M-HKUST-1

Comment regarding the geometries and energetics for M = Sn and Pb

**Table S1.** Calculated cell parameters and cell volumes for M-DOBDC and M-HKUST-1 systems compared to experiments.

| MOF     | Metal | a (Å) | c (Å)    | V (Å <sup>3</sup> ) | Experiment          |                   |                        |
|---------|-------|-------|----------|---------------------|---------------------|-------------------|------------------------|
|         |       |       |          |                     | a (Å)               | c (Å)             | V (Å <sup>3</sup> )    |
| DOBDC   | Be    | 26.29 | 6.32     | 3780.72             |                     |                   |                        |
|         | Mg    | 26.12 | 6.93     | 4097.08             | 26.02 <sup>1</sup>  | 6.72 <sup>1</sup> | 3940.75 <sup>1</sup>   |
|         | Ca    | 26.54 | 7.69     | 4690.18             |                     |                   |                        |
|         | Sr    | 26.13 | 8.08     | 4779.14             |                     |                   |                        |
|         | Sc    | 26.11 | 7.25     | 4280.02             |                     |                   |                        |
|         | Ti    | 26.39 | 6.99     | 4212.88             |                     |                   |                        |
|         | V     | 26.07 | 6.97     | 4104.92             |                     |                   |                        |
|         | Cr    | 26.00 | 6.94     | 4064.92             |                     |                   |                        |
|         | Mn    | 26.35 | 7.15     | 4297.38             | 26.23 <sup>2</sup>  | 7.04 <sup>2</sup> |                        |
|         | Fe    | 26.36 | 6.88     | 4142.66             | 26.10 <sup>3</sup>  | 6.85 <sup>3</sup> | 4041.30 <sup>3</sup>   |
|         | Co    | 26.16 | 6.89     | 3967.10             | 26.11 <sup>4</sup>  | 6.72 <sup>4</sup> |                        |
|         | Ni    | 25.89 | 6.79     | 3898.34             | 25.79 <sup>5</sup>  | 6.77 <sup>5</sup> | 3898.34 <sup>5</sup>   |
|         | Cu    | 25.60 | 6.70     | 3806.73             | 26.00 <sup>6</sup>  | 6.26 <sup>6</sup> | 3663.3 <sup>6</sup>    |
|         | Zn    | 26.17 | 6.92     | 4102.34             | 25.93 <sup>7</sup>  | 6.83 <sup>7</sup> |                        |
|         | Mo    | 26.22 | 7.00     | 4168.57             |                     |                   |                        |
|         | Sn    | 26.62 | 7.19     | 4411.11             |                     |                   |                        |
|         | W     | 26.98 | 6.29     | 3964.40             |                     |                   |                        |
| Pb      | 26.65 | 8.05  | 4948.50  |                     |                     |                   |                        |
| HKUST-1 | Be    | 25.42 |          | 16428.72            |                     |                   |                        |
|         | Mg    | 26.62 |          | 18853.14            |                     |                   |                        |
|         | Ca    | 27.36 |          | 20480.62            |                     |                   |                        |
|         | Sr    | 27.72 |          | 21309.72            |                     |                   |                        |
|         | Sc    | 26.62 |          | 18867.43            |                     |                   |                        |
|         | Ti    | 26.68 |          | 18992.96            |                     |                   |                        |
|         | V     | 26.73 |          | 19091.71            |                     |                   |                        |
|         | Cr    | 26.70 |          | 19028.93            | 26.67 <sup>8</sup>  |                   | 18959.88 <sup>8</sup>  |
|         | Mn    | 26.38 |          | 18352.21            |                     |                   |                        |
|         | Fe    | 26.35 |          | 18303.91            |                     |                   |                        |
|         | Co    | 26.21 |          | 18025.33            |                     |                   |                        |
|         | Ni    | 26.31 |          | 18219.00            | 26.59 <sup>9</sup>  |                   | 18808.57 <sup>9</sup>  |
|         | Cu    | 26.48 |          | 18572.70            | 26.34 <sup>10</sup> |                   | 18280.00 <sup>10</sup> |
|         | Zn    | 26.82 |          | 19286.58            | 26.52 <sup>11</sup> |                   | 18651.79 <sup>11</sup> |
|         | Mo    | 27.30 |          | 20337.12            | 27.13 <sup>12</sup> |                   | 19966.47 <sup>12</sup> |
|         | Sn    | 27.03 |          | 19741.74            |                     |                   |                        |
|         | W     | 27.19 |          | 20096.96            |                     |                   |                        |
| Pb      | 27.64 |       | 21106.10 |                     |                     |                   |                        |

**Table S2.** Average calculated metal-oxygen bond lengths (in Å) within M-DOBDC. In all cases the metal ion adopts either a tetragonal or square pyramidal coordination to oxygen; a missing value for d(M-O5) indicates that the structure adopts a tetrahedral geometry.

| MOFs  | Metal | d(M-O1) | d(M-O2) | d(M-O3) | d(M-O4) | d(M-O5) |
|-------|-------|---------|---------|---------|---------|---------|
| DOBDC | Be    | 1.54    | 1.622   | 1.681   | 1.756   |         |
|       | Mg    | 2.032   | 2.032   | 2.045   | 2.048   | 2.087   |
|       | Ca    | 2.284   | 2.304   | 2.326   | 2.352   | 2.375   |
|       | Sr    | 2.436   | 2.468   | 2.535   | 2.536   | 2.549   |
|       | Sc    | 2.105   | 2.221   | 2.03    | 2.109   | 2.205   |
|       | Ti    | 2.059   | 2.061   | 2.013   | 2.081   | 1.963   |
|       | V     | 2.033   | 2.059   | 2.102   | 2.025   | 2.07    |
|       | Cr    | 2.002   | 2.033   | 2.038   | 2.079   |         |
|       | Mn    | 2.088   | 2.103   | 2.107   | 2.145   | 2.264   |
|       | Fe    | 2.045   | 2.072   | 2.074   | 2.128   | 2.156   |
|       | Co    | 2.003   | 2.026   | 2.065   | 2.074   | 2.123   |
|       | Ni    | 1.986   | 2.023   | 2.023   | 2.102   | 2.108   |
|       | Cu    | 1.974   | 1.988   | 1.999   | 2.056   |         |
|       | Zn    | 2.033   | 2.045   | 2.052   | 2.101   | 2.195   |
|       | Mo    | 2.073   | 2.106   | 2.169   | 2.179   | 2.187   |
|       | W     | 2.047   | 2.05    | 2.175   | 2.216   | 2.217   |
| Sn    | 2.291 | 2.313   | 2.328   | 2.34    |         |         |
| Pb    | 2.328 | 2.388   | 2.554   | 2.611   | 2.696   |         |

**Table S3.** Average calculated metal-oxygen and metal-metal bond lengths (in Å) for M-HKUST-1. The SBUs in M-HKUST-1s exhibit a paddle wheel geometry, with 4 metal-oxygen bonds and one metal-metal bond.

| MOFs    | Metal | d(M-O1) | d(M-O2) | d(M-O3) | d(M-O4) | d(M-M) |
|---------|-------|---------|---------|---------|---------|--------|
| HKUST-1 | Be    | 1.738   | 1.738   | 1.73    | 1.73    | 2.469  |
|         | Mg    | 2.008   | 2.008   | 2.008   | 2.008   | 2.937  |
|         | Ca    | 2.254   | 2.254   | 2.254   | 2.254   | 3.61   |
|         | Sr    | 2.41    | 2.41    | 2.41    | 2.41    | 3.895  |
|         | Sc    | 2.079   | 2.079   | 2.079   | 2.079   | 3.151  |
|         | Ti    | 1.973   | 1.973   | 1.973   | 1.973   | 2.872  |
|         | V     | 2.037   | 2.037   | 2.037   | 2.037   | 1.97   |
|         | Cr    | 1.99    | 1.99    | 1.99    | 1.99    | 2.086  |
|         | Mn    | 1.936   | 1.936   | 1.936   | 1.936   | 2.578  |
|         | Fe    | 1.925   | 1.925   | 1.925   | 1.925   | 2.201  |
|         | Co    | 1.908   | 1.908   | 1.908   | 1.908   | 2.235  |
|         | Ni    | 1.938   | 1.938   | 1.938   | 1.938   | 2.351  |
|         | Cu    | 1.975   | 1.975   | 1.975   | 1.975   | 2.521  |
|         | Zn    | 2.032   | 2.032   | 2.032   | 2.032   | 2.644  |
|         | Mo    | 2.1     | 2.1     | 2.101   | 2.101   | 2.136  |
|         | W     | 2.077   | 2.077   | 2.077   | 2.077   | 2.214  |
| Sn      | 2.265 | 2.265   | 2.293   | 2.293   | 4.199   |        |
| Pb      | 2.38  | 2.38    | 2.379   | 2.379   | 4.212   |        |

**Table S4.** Tabulated ionic radii of +2 metal ions<sup>13</sup> and electronegativity of the metal atoms<sup>14</sup>. Low spin configurations refer to metals in M-DOBDC; high spin cases refer to M-HKUST-1.

| Metal | Radii (Å)          |           | Electro-<br>negativity |
|-------|--------------------|-----------|------------------------|
|       | Low spin           | High spin |                        |
| Be    | 0.45               |           | 1.57                   |
| Mg    | 0.72               |           | 1.31                   |
| Ca    | 1.00               |           | 1                      |
| Sr    | 1.18               |           | 0.95                   |
| Sc    |                    |           | 1.36                   |
| Ti    | 0.86               |           | 1.54                   |
| V     | 0.79               |           | 1.63                   |
| Cr    | 0.73               | 0.80      | 1.66                   |
| Mn    | 0.67               | 0.83      | 1.55                   |
| Fe    | 0.61               | 0.78      | 1.83                   |
| Co    | 0.65               | 0.745     | 1.88                   |
| Ni    | 0.69               |           | 1.91                   |
| Cu    | 0.73               |           | 1.9                    |
| Zn    | 0.74               |           | 1.65                   |
| Mo    |                    |           | 2.16                   |
| W     |                    |           | 2.36                   |
| Sn    | 0.93 <sup>15</sup> |           | 1.96                   |
| Pb    | 1.19               |           | 2.33                   |

**Table S5.** Calculated bond lengths (Å) and bond angles (°) involving the MOF metal site (M) and adsorbed CO<sub>2</sub>. d(M-O) refers to the distance between the metal and the nearest oxygen in CO<sub>2</sub>; d(MO-CO) is the length of the O-C bond (within CO<sub>2</sub>) closest to the metal; d(C-O) is the length of the O-C bond (within CO<sub>2</sub>) farthest from the metal; <M-O-C is the angle formed by the metal and the nearest O and C in CO<sub>2</sub>; <O-C-O is bending angle within the CO<sub>2</sub> molecule.

| MOF       | Metal | d(M-O) | d(MO-CO) | d(C-O) | <M-O-C  | <O-C-O  |
|-----------|-------|--------|----------|--------|---------|---------|
| M/DOBDC   | Be    | 3.858  | 1.181    | 1.179  | 84.261  | 180.000 |
|           | Mg    | 2.392  | 1.184    | 1.174  | 130.950 | 178.350 |
|           | Ca    | 2.623  | 1.182    | 1.174  | 148.845 | 178.599 |
|           | Sr    | 2.842  | 1.181    | 1.176  | 160.263 | 178.472 |
|           | Sc    | 2.445  | 1.187    | 1.172  | 135.160 | 176.462 |
|           | Ti    | 2.444  | 1.186    | 1.173  | 131.538 | 177.235 |
|           | V     | 2.340  | 1.185    | 1.173  | 133.553 | 177.738 |
|           | Cr    | 3.286  | 1.182    | 1.179  | 110.796 | 180.000 |
|           | Mn    | 2.695  | 1.183    | 1.176  | 125.079 | 180.000 |
|           | Fe    | 2.717  | 1.183    | 1.177  | 119.707 | 179.141 |
|           | Co    | 2.812  | 1.183    | 1.177  | 115.950 | 179.053 |
|           | Ni    | 2.617  | 1.183    | 1.176  | 120.292 | 179.016 |
|           | Cu    | 3.228  | 1.181    | 1.179  | 109.914 | 180.000 |
|           | Zn    | 2.867  | 1.183    | 1.177  | 115.937 | 178.883 |
|           | Mo    | 2.528  | 1.185    | 1.174  | 128.753 | 178.437 |
|           | W     | 2.450  | 1.187    | 1.173  | 132.420 | 178.262 |
|           | Sn    | 4.007  | 1.180    | 1.180  | 84.521  | 180.000 |
|           | Pb    | 3.402  | 1.182    | 1.178  | 131.434 | 180.000 |
| M/HKUST-1 | Be    | 1.945  | 1.190    | 1.169  | 118.703 | 177.382 |
|           | Mg    | 2.221  | 1.191    | 1.168  | 117.588 | 177.245 |
|           | Ca    | 2.624  | 1.188    | 1.170  | 111.801 | 177.425 |
|           | Sr    | 2.861  | 1.187    | 1.172  | 108.801 | 177.576 |
|           | Sc    | 2.096  | 1.290    | 1.204  | 88.769  | 140.807 |
|           | Ti    | 2.686  | 1.189    | 1.172  | 111.964 | 180.000 |
|           | V     | 2.772  | 1.186    | 1.174  | 110.961 | 180.000 |
|           | Cr    | 3.149  | 1.182    | 1.177  | 101.390 | 180.000 |
|           | Mn    | 3.106  | 1.182    | 1.177  | 100.034 | 180.000 |
|           | Fe    | 3.282  | 1.180    | 1.179  | 96.000  | 180.000 |
|           | Co    | 2.584  | 1.185    | 1.175  | 112.243 | 180.000 |
|           | Ni    | 2.731  | 1.184    | 1.176  | 107.581 | 180.000 |
|           | Cu    | 2.769  | 1.184    | 1.176  | 106.633 | 180.000 |
|           | Zn    | 2.384  | 1.188    | 1.171  | 116.371 | 178.106 |
|           | Mo    | 3.340  | 1.182    | 1.178  | 100.457 | 180.000 |
|           | W     | 3.127  | 1.184    | 1.176  | 105.326 | 180.000 |
|           | Sn    | 3.811  | 1.177    | 1.181  | 79.773  | 180.000 |
|           | Pb    | 3.840  | 1.182    | 1.178  | 73.975  | 180.000 |

**Table S6.** Calculated binding energies ( $\Delta E$ ) at 0K, zero point energies (ZPE), thermal energy contributions (TE) at 300K, and adsorption enthalpies ( $\Delta H$ ) at 300K for M-DOBDC and M-HKUST-1 within the LDA, PBE-GGA, DFT-D2 and revPBE-vdW methods. All energies are given in kJ/mol CO<sub>2</sub>. rPBE-vdW is shorthand for revPBE-vdW

|           |        | $\Delta E$ (kJ/mol) |        |        |          | ZPE (kJ/mol) |          | TE (kJ/mol) |          | $\Delta H$ (kJ/mol) |          | Exp       |
|-----------|--------|---------------------|--------|--------|----------|--------------|----------|-------------|----------|---------------------|----------|-----------|
|           |        | LDA                 | PBE    | DFT-D2 | rPBE-vdW | DFT-D2       | rPBE-vdW | DFT-D2      | rPBE-vdW | DFT-D2              | rPBE-vdW |           |
| M-DOBDC   | Be     | -20.62              | -9.71  | -19.49 | -34.01   | 2.88         | 1.38     | 1.04        | 0.82     | -15.57              | -31.81   |           |
|           | Mg     | -52.30              | -27.06 | -42.31 | -50.89   | 2.36         | 2.15     | 1.40        | 1.53     | -38.55              | -47.20   | -44.2±4.6 |
|           | Ca     | -48.28              | -28.67 | -39.87 | -50.21   | 2.30         | 2.03     | 1.44        | 1.93     | -36.13              | -46.26   |           |
|           | Sr     | -41.67              | -25.50 | -34.36 | -46.88   | 2.64         | 1.35     | 1.35        | 0.91     | -30.37              | -44.63   |           |
|           | Sc     |                     | -21.03 | -43.85 | -53.92   | 0.24         | 0.84     | 1.82        | 1.53     | -41.79              | -51.54   |           |
|           | Ti     | -69.16              | -26.02 | -51.23 | -56.15   | 2.40         | 2.25     | 0.98        | 1.22     | -47.85              | -52.69   |           |
|           | V      | -52.61              | -29.63 | -54.13 | -57.49   | 2.88         | 2.92     | -0.94       | 1.11     | -52.18              | -53.46   |           |
|           | Cr     | -36.41              | -10.94 | -19.14 | -36.68   | 1.73         | 1.53     | -0.02       | 2.30     | -17.43              | -32.85   |           |
|           | Mn     | -37.06              | -16.55 | -28.56 | -39.12   | 0.56         | 1.27     | -0.91       | 0.59     | -28.91              | -37.25   |           |
|           | Fe     | -35.23              | -9.54  | -25.19 | -33.67   | 2.55         | 1.27     | -0.94       | -0.01    | -23.58              | -32.40   |           |
|           | Co     | -39.38              | -14.68 | -29.88 | -39.32   | 1.67         | 1.56     | -0.73       | 0.52     | -28.95              | -37.24   | -35.7±1.9 |
|           | Ni     |                     | -17.05 | -33.62 | -41.22   | 3.81         | 1.68     | 0.47        | 1.82     | -29.35              | -37.72   | -39.6±1.5 |
|           | Cu     | -30.70              | -9.10  | -19.14 | -27.17   | 3.37         | 2.07     | 0.12        | -0.04    | -15.65              | -25.14   | -24       |
|           | Zn     | -40.87              | -16.51 | -30.53 | -40.99   | 1.16         | 1.52     | -0.10       | 2.89     | -29.47              | -36.59   | 30.5±0.5  |
|           | Mo     | -72.22              | -29.32 | -48.78 | -50.05   | 1.27         | 3.05     | 0.24        | 1.08     | -47.27              | -45.93   |           |
| W         | -72.37 | -31.11              | -44.68 | -48.92 | 1.71     | 2.95         | 1.40     | 0.85        | -41.58   | -45.12              |          |           |
| Sn        | -26.23 | -7.52               | -17.56 | -26.95 | 3.82     | 1.43         | -0.44    | 0.46        | -14.18   | -25.06              |          |           |
| Pb        | -26.09 | -7.33               | -13.14 | -28.17 | 2.44     | 1.77         | 1.31     | 0.78        | -9.39    | -25.62              |          |           |
| M-HKUST-1 | Be     | -61.63              | -29.04 | -43.68 | -48.09   | 2.34         | 3.12     | 0.04        | -2.54    | -41.30              | -47.51   |           |
|           | Mg     | -59.50              | -35.37 | -52.27 | -57.12   | 3.84         | 2.29     | 1.46        | -1.32    | -46.96              | -56.14   |           |
|           | Ca     | -48.79              | -25.15 | -50.58 | -51.41   | 2.71         | 1.80     | -2.18       | -1.69    | -50.06              | -51.30   |           |
|           | Sr     | -45.26              | -20.85 | -52.65 | -51.78   | 2.88         | 7.70     | 3.92        | -0.98    | -45.85              | -45.06   |           |
|           | Sc     | -57.40              | -31.91 | -42.91 | -47.81   | 1.31         | 0.85     | -2.02       | 2.16     | -43.62              | -44.80   |           |
|           | Ti     | -42.32              | -13.59 | -27.87 | -29.90   | 0.33         | 1.61     | -3.36       | -2.33    | -30.90              | -30.62   |           |
|           | V      | -29.98              | -2.81  | -17.83 | -18.72   | 0.08         | 1.22     | -5.67       | -0.40    | -23.42              | -17.89   |           |
|           | Cr     | -27.13              | -7.59  | -21.32 | -24.85   | 2.39         | 2.01     | -1.52       | 0.76     | -20.44              | -22.08   | -26.7     |
|           | Mn     | -26.10              | -5.80  | -21.14 | -25.68   | 4.49         | 1.21     | -4.22       | -1.93    | -20.87              | -26.40   |           |
|           | Fe     | -30.47              | -4.93  | -19.95 | -25.76   | 6.51         | 0.68     | 1.47        | -1.44    | -11.97              | -26.52   |           |
|           | Co     | -43.66              | -11.92 | -26.37 | -30.36   | 1.73         | 2.17     | 2.46        | -0.72    | -22.19              | -28.91   |           |
|           | Ni     | -20.46              | -9.59  | -23.50 | -28.45   | 0.90         | 1.09     | -1.05       | -4.95    | -23.65              | -32.31   | -36.8     |
|           | Cu     | -31.49              | -8.93  | -22.56 | -27.32   | 4.81         | 0.94     | -0.08       | -4.09    | -17.83              | -30.47   | -23.7±8.2 |
|           | Zn     | -55.56              | -25.37 | -38.67 | -41.08   | 2.64         | 3.58     | 1.65        | 0.94     | -34.38              | -36.56   |           |
|           | Mo     | -25.96              | -6.40  | -22.03 | -25.55   | 1.88         | 1.35     | 2.65        | -2.21    | -17.50              | -26.41   | -25.6     |
| W         | -26.32 | -5.94               | -21.48 | -22.40 | 9.45     | 0.85         | -3.90    | 2.16        | -15.93   | -19.39              |          |           |
| Sn        | -20.94 | 1.69                | -9.04  | -21.01 | -2.33    | 1.61         | -2.69    | -2.33       | -14.06   | -21.74              |          |           |
| Pb        | -3.72  | 4.44                | -7.31  | -10.15 | 4.09     | 1.22         | -1.86    | -0.40       | -5.07    | -9.33               |          |           |

**Table S7.** Change in the metal atom's ( $\Delta q_M$ ) and CO<sub>2</sub> molecule's partial charge ( $\Delta q_{CO_2}$ ) upon CO<sub>2</sub> adsorption.  $\Delta q < 0$  indicates a reduction in positive charge.

| metal | DOBDC        |                   | HKUST-1      |                   |
|-------|--------------|-------------------|--------------|-------------------|
|       | $\Delta q_M$ | $\Delta q_{CO_2}$ | $\Delta q_M$ | $\Delta q_{CO_2}$ |
| Sc    | 0.160        | 0.007             | 0.221        | -0.314            |
| Ti    | -0.398       | 0.039             | 0.141        | -0.002            |
| V     | -0.204       | 0.031             | 0.422        | 0.002             |
| Cr    | 0.057        | -0.037            | 0.055        | 0.001             |
| Mn    | 0.171        | -0.015            | 0.095        | -0.001            |
| Fe    | -0.042       | -0.019            | 0.062        | 0.000             |
| Co    | 0.042        | -0.021            | -0.035       | 0.010             |
| Ni    | -0.035       | -0.003            | 0.021        | 0.006             |
| Cu    | 0.044        | -0.016            | 0.117        | 0.006             |
| Zn    | 0.072        | -0.024            | -0.140       | 0.051             |
| Mo    | -0.264       | 0.044             | 0.059        | -0.006            |
| W     | -0.075       | 0.056             | 0.083        | -0.003            |

**Figure S1.** *trans*-configuration of CO<sub>2</sub> molecules in Cu-HKUST-1. (red = Oxygen, black = Carbon, blue = copper)

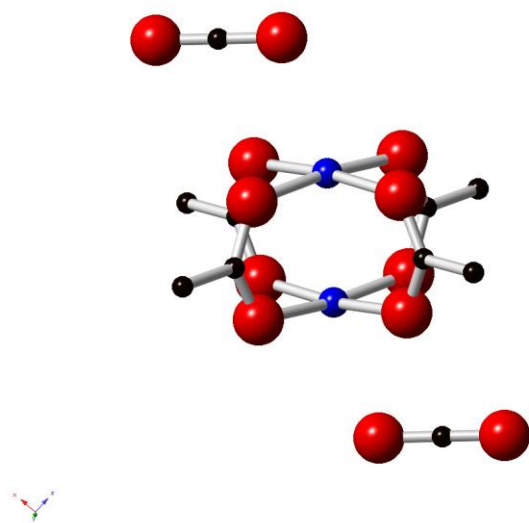



**Figure S2.** Calculated local geometries for the M-DOBDC SBU; for clarity, only a portion of the infinite SBU chain is included. Oxygen atoms are red, other colors represent metals. Numbers following the element name indicate the coordination of the metal site. Clusters highlighted in red (Be, Cr, Cu, Sn) exhibit tetrahedral bonding of the metal ions; yellow highlighting (Pb) indicates the presence of other significant structural distortions.

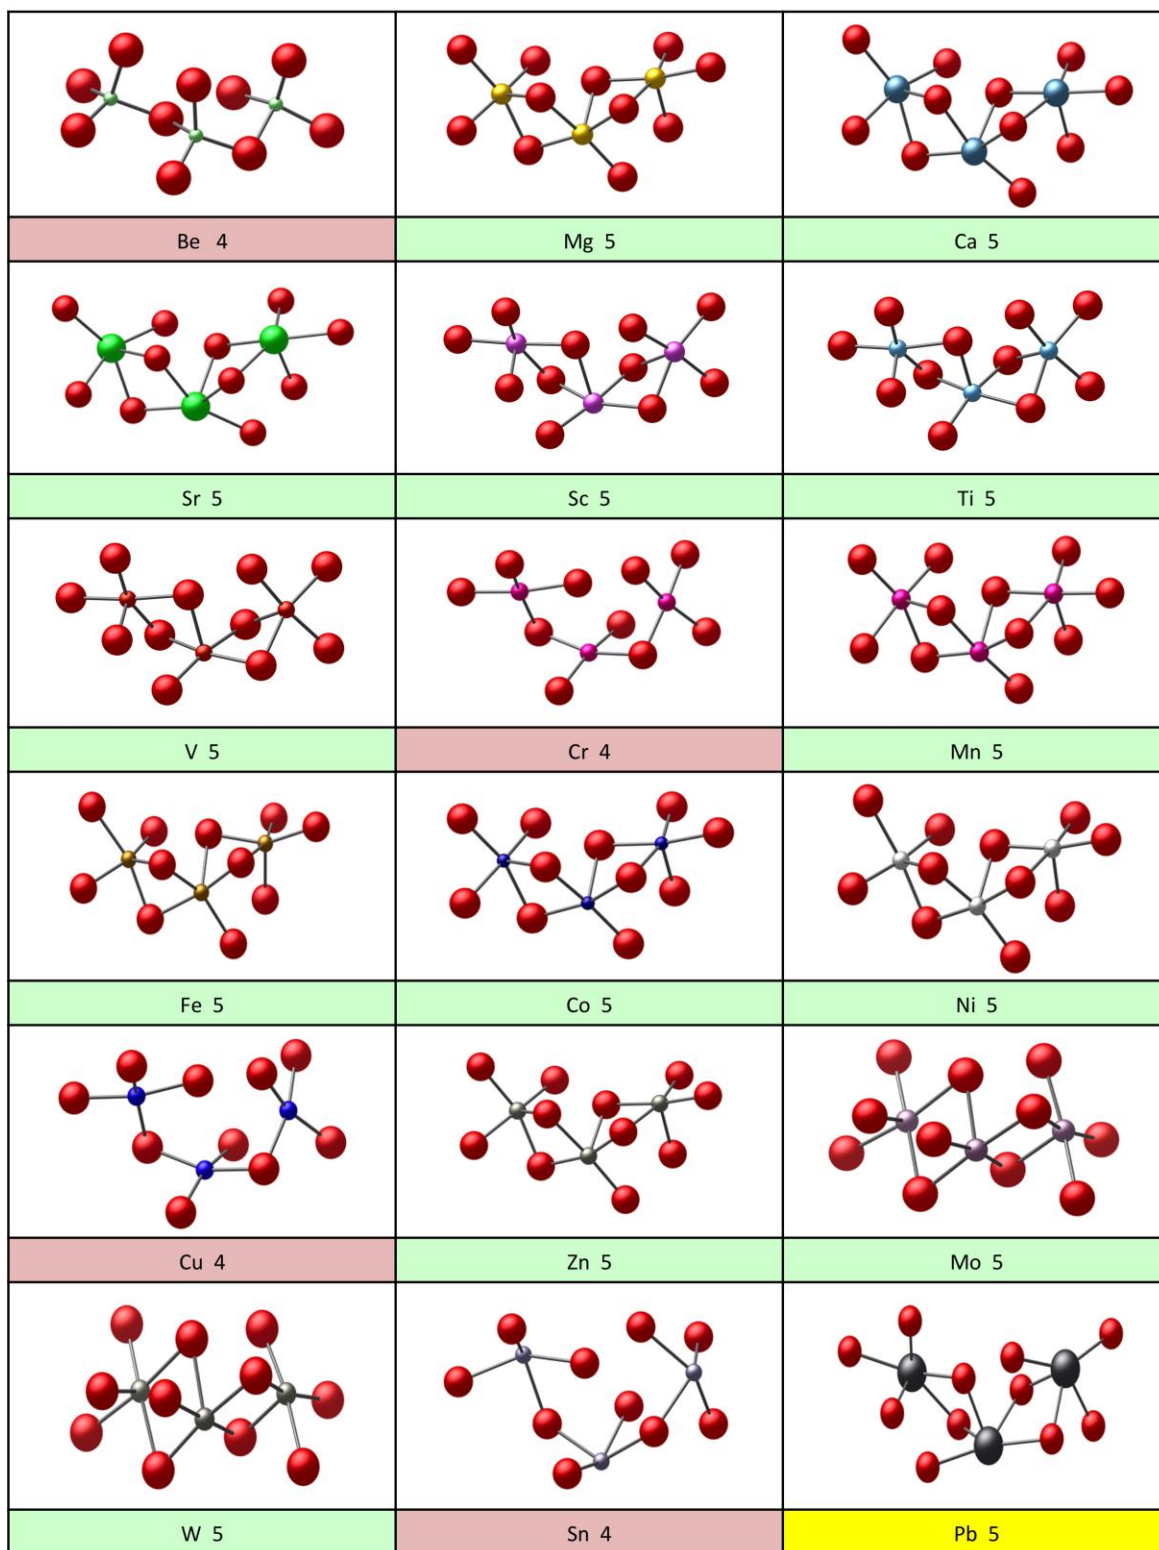

**Figure S3.** Calculated local geometries for the M-HKUST-1 SBU. Oxygen atoms are red, carbon is black, and other colors represent metals. Clusters highlighted in yellow (Ca, Sr, Sn, Pb) exhibit large distortions to the paddle-wheel structure.

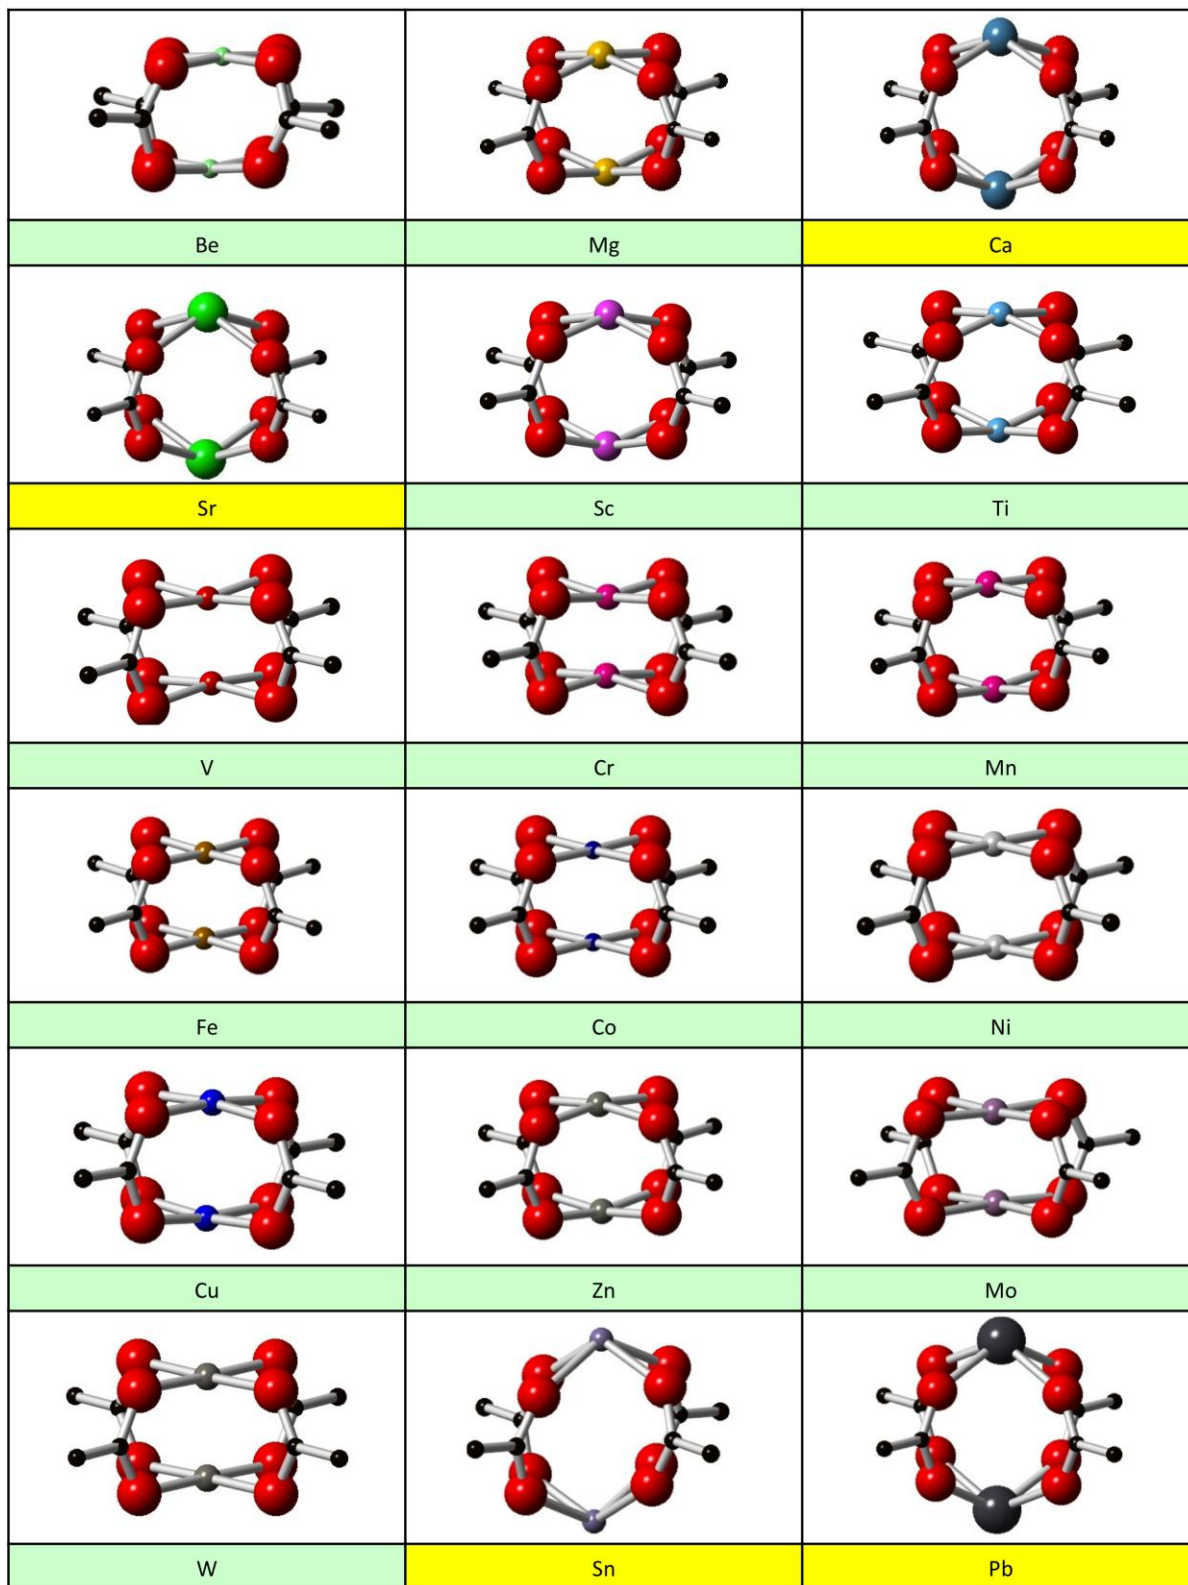

**Figure S4.** Charge density difference plots for M-DOBDC. Red and yellow indicate charge accumulation; blue indicates charge depletion. For clarity, only the CO<sub>2</sub> molecule, the metal, and the metal's nearest-neighbor oxygen atoms are illustrated.

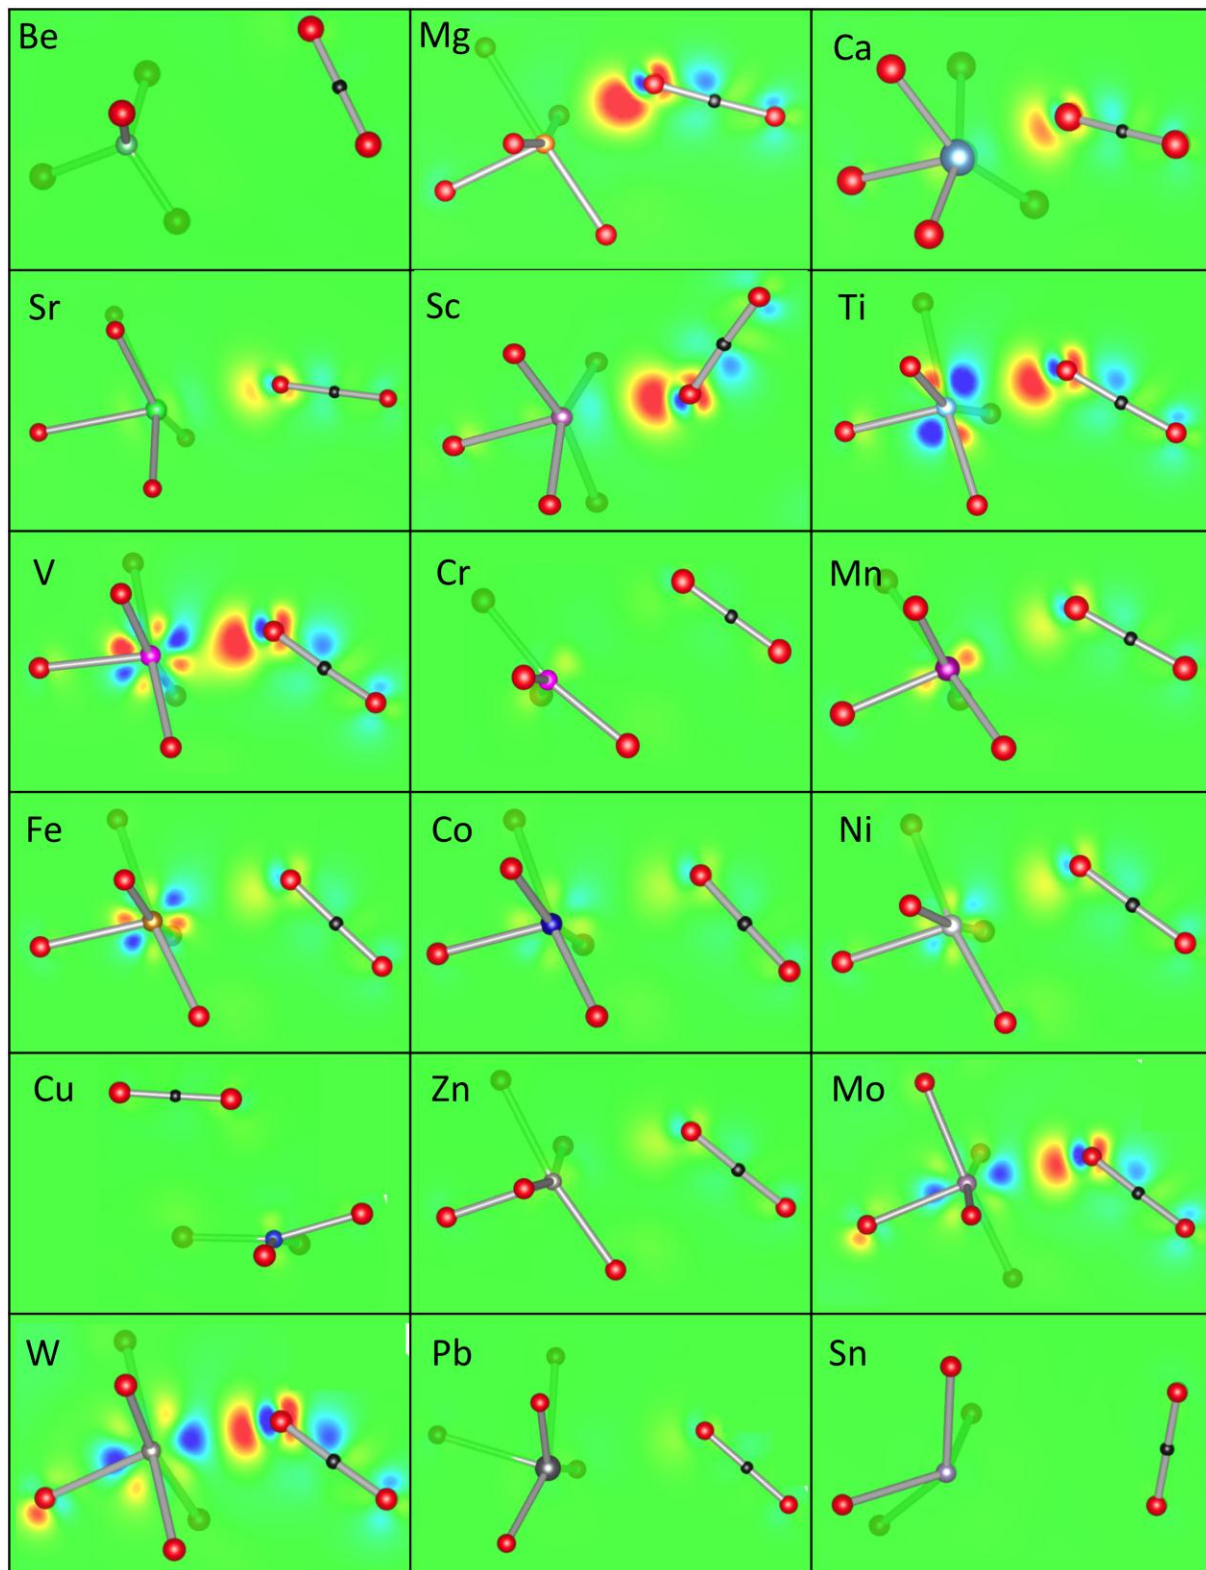



**Figure S5.** Charge density difference plots for M-HKUST-1. Red and yellow indicate charge accumulation; blue indicates charge depletion. For clarity, only the CO<sub>2</sub> molecules and atoms from the paddle-wheel SBU are illustrated.

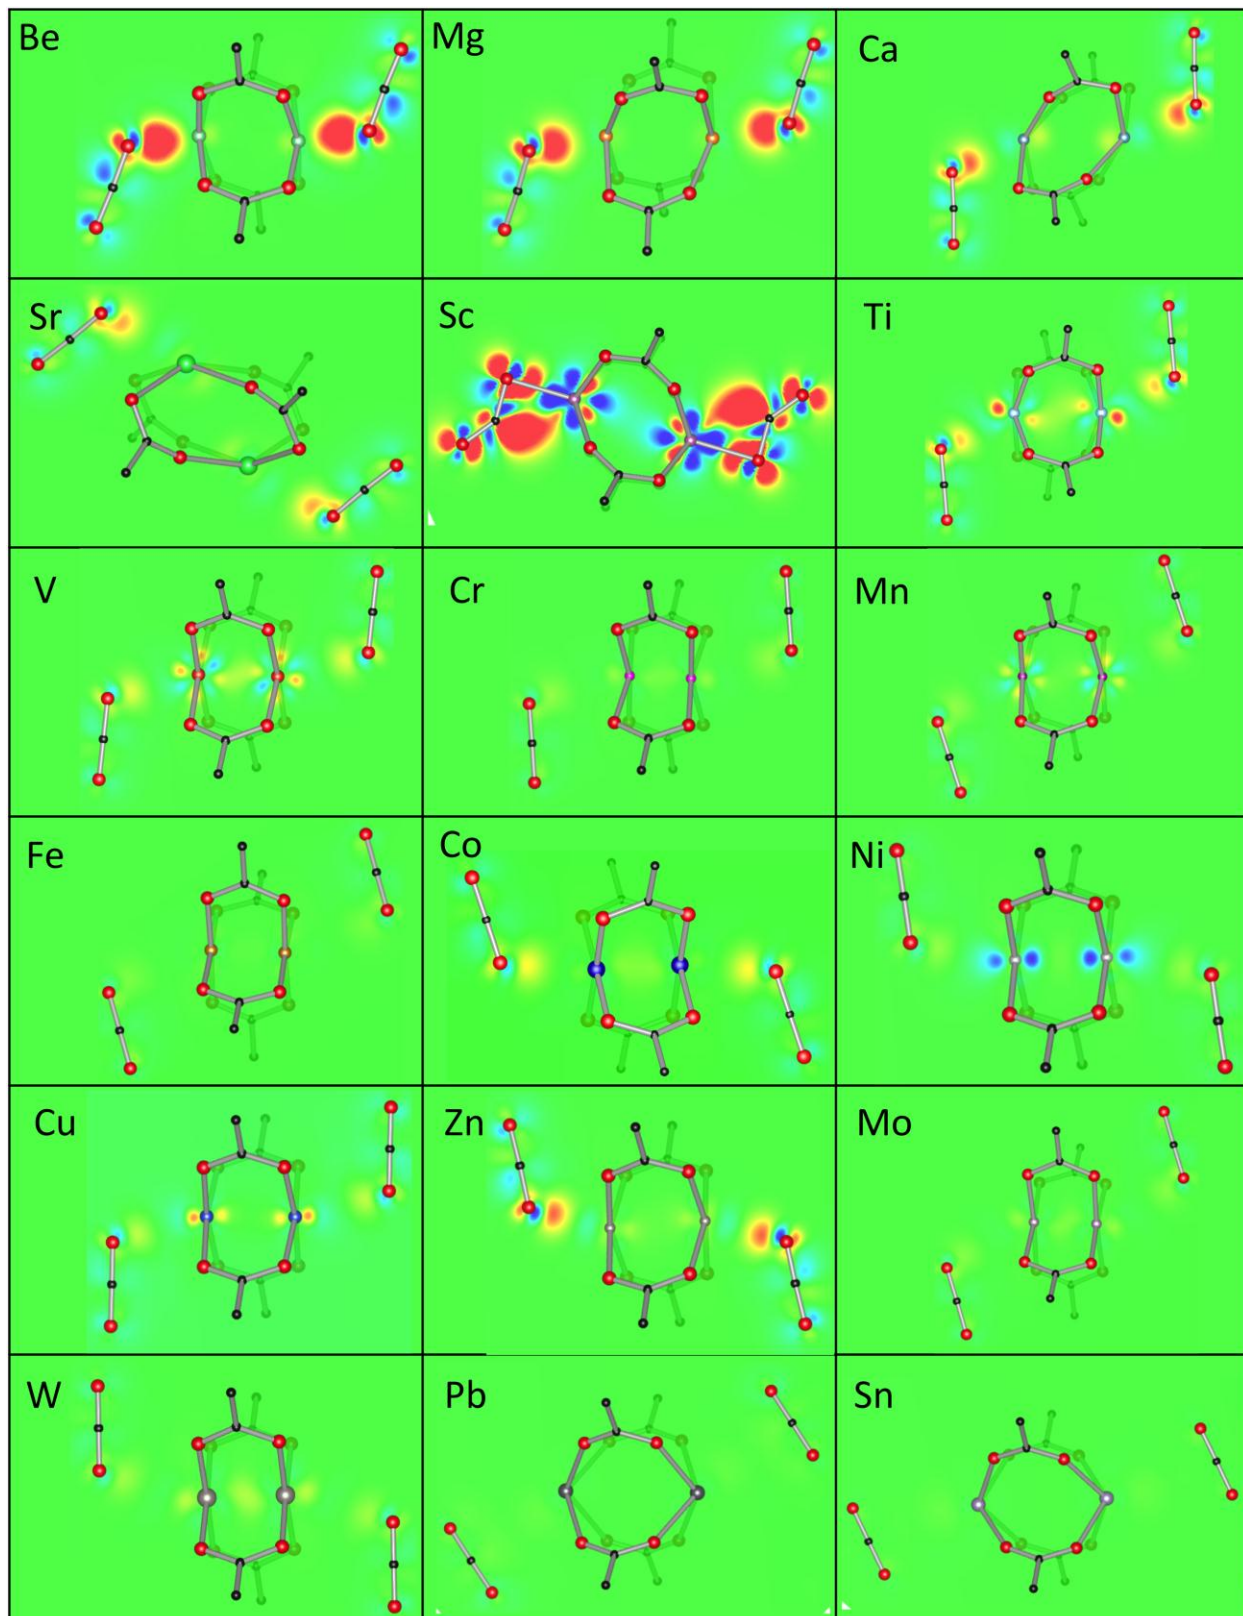

Figure S6. CO<sub>2</sub> and metal LDOS for M-DOBDC. (Be, Mg, Ca, Sr, Sc, Ti, V, Cr, and Mn)

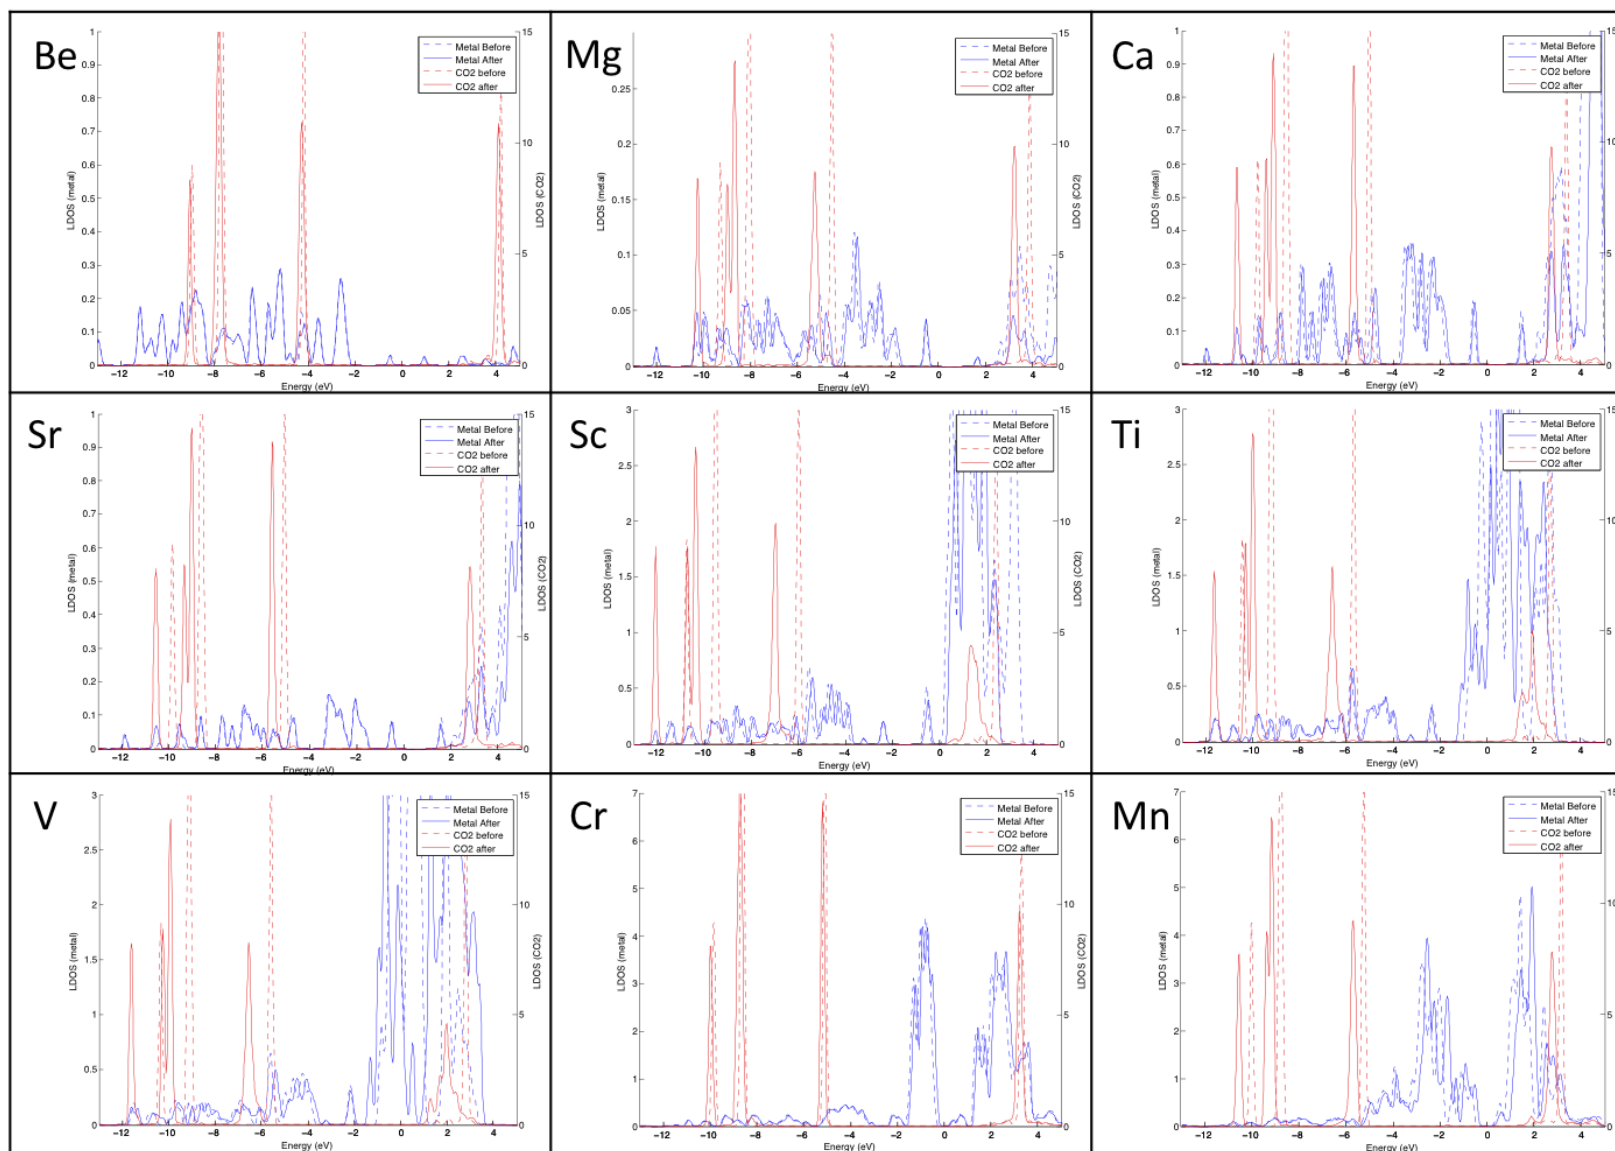

**Figure S7.** Figure S7. CO<sub>2</sub> and metal LDOS for M-DOBDC. (Fe, Co, Ni, Cu, Zn, Mo, W, Sn, and Pb)

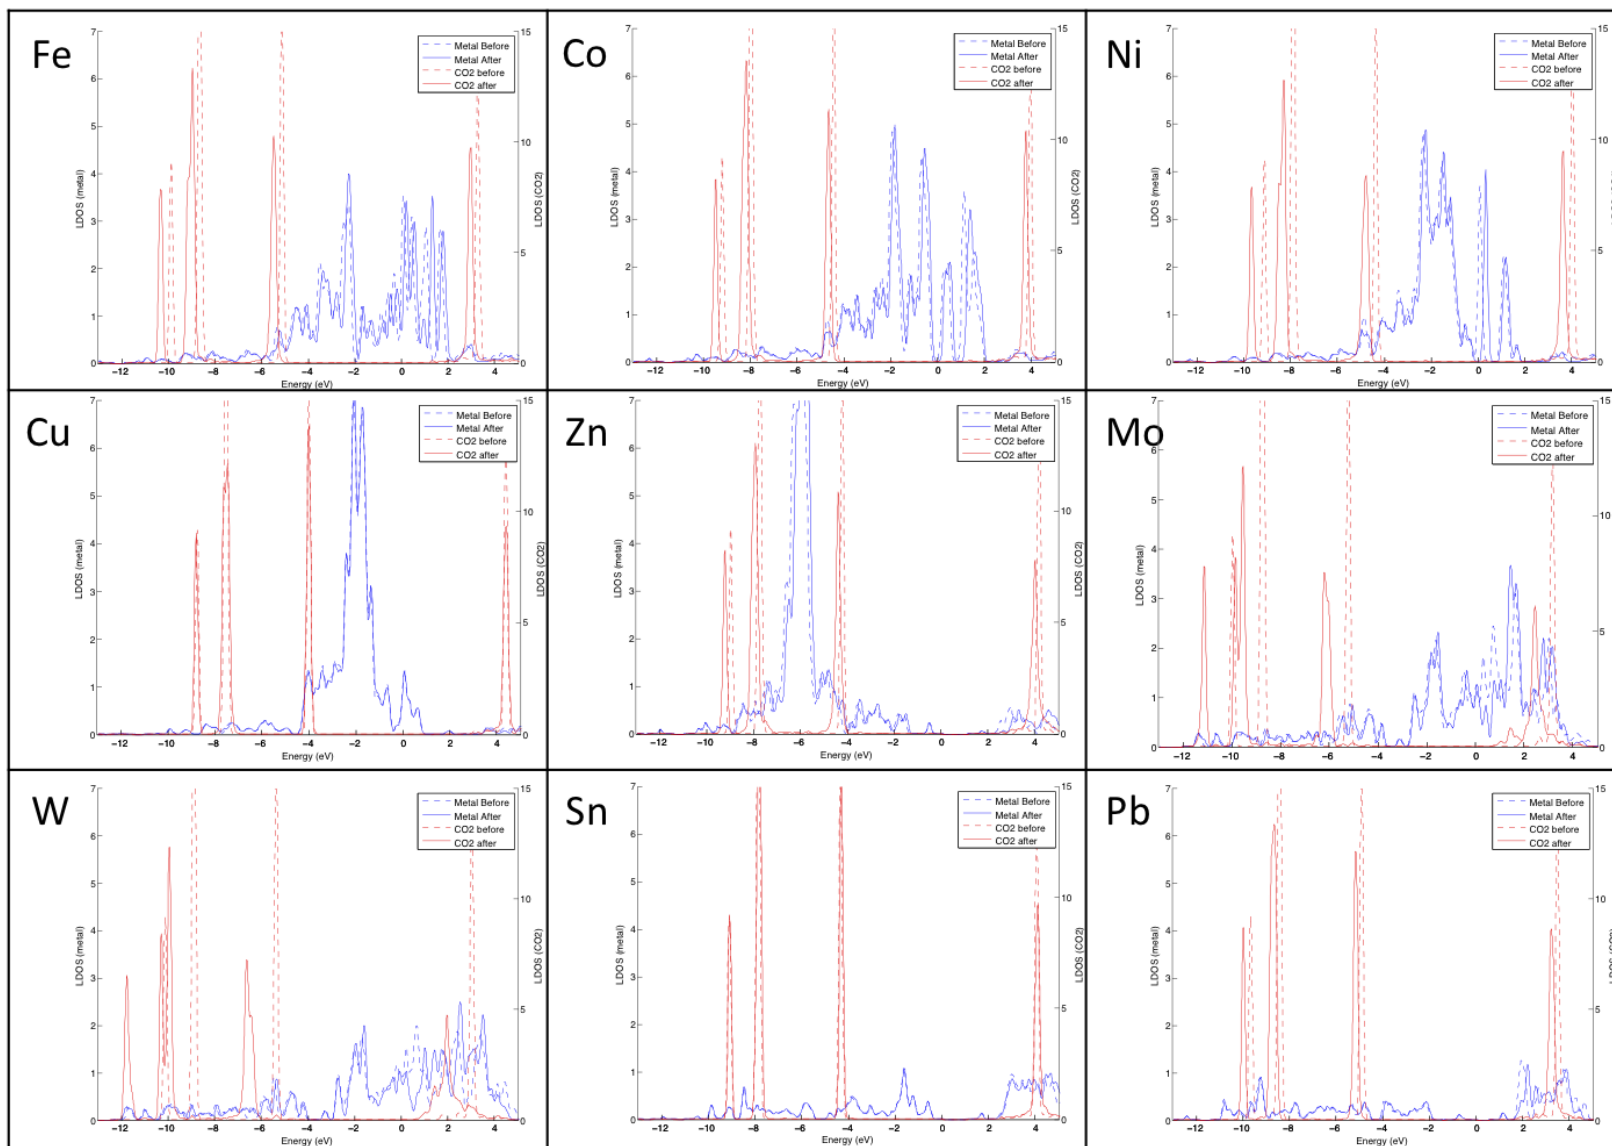

**Figure S8.** CO<sub>2</sub> and metal LDOS for M-HKSUT-1. (Be, Mg, Ca, Sr, Sc, Ti, V, Cr, and Mn)

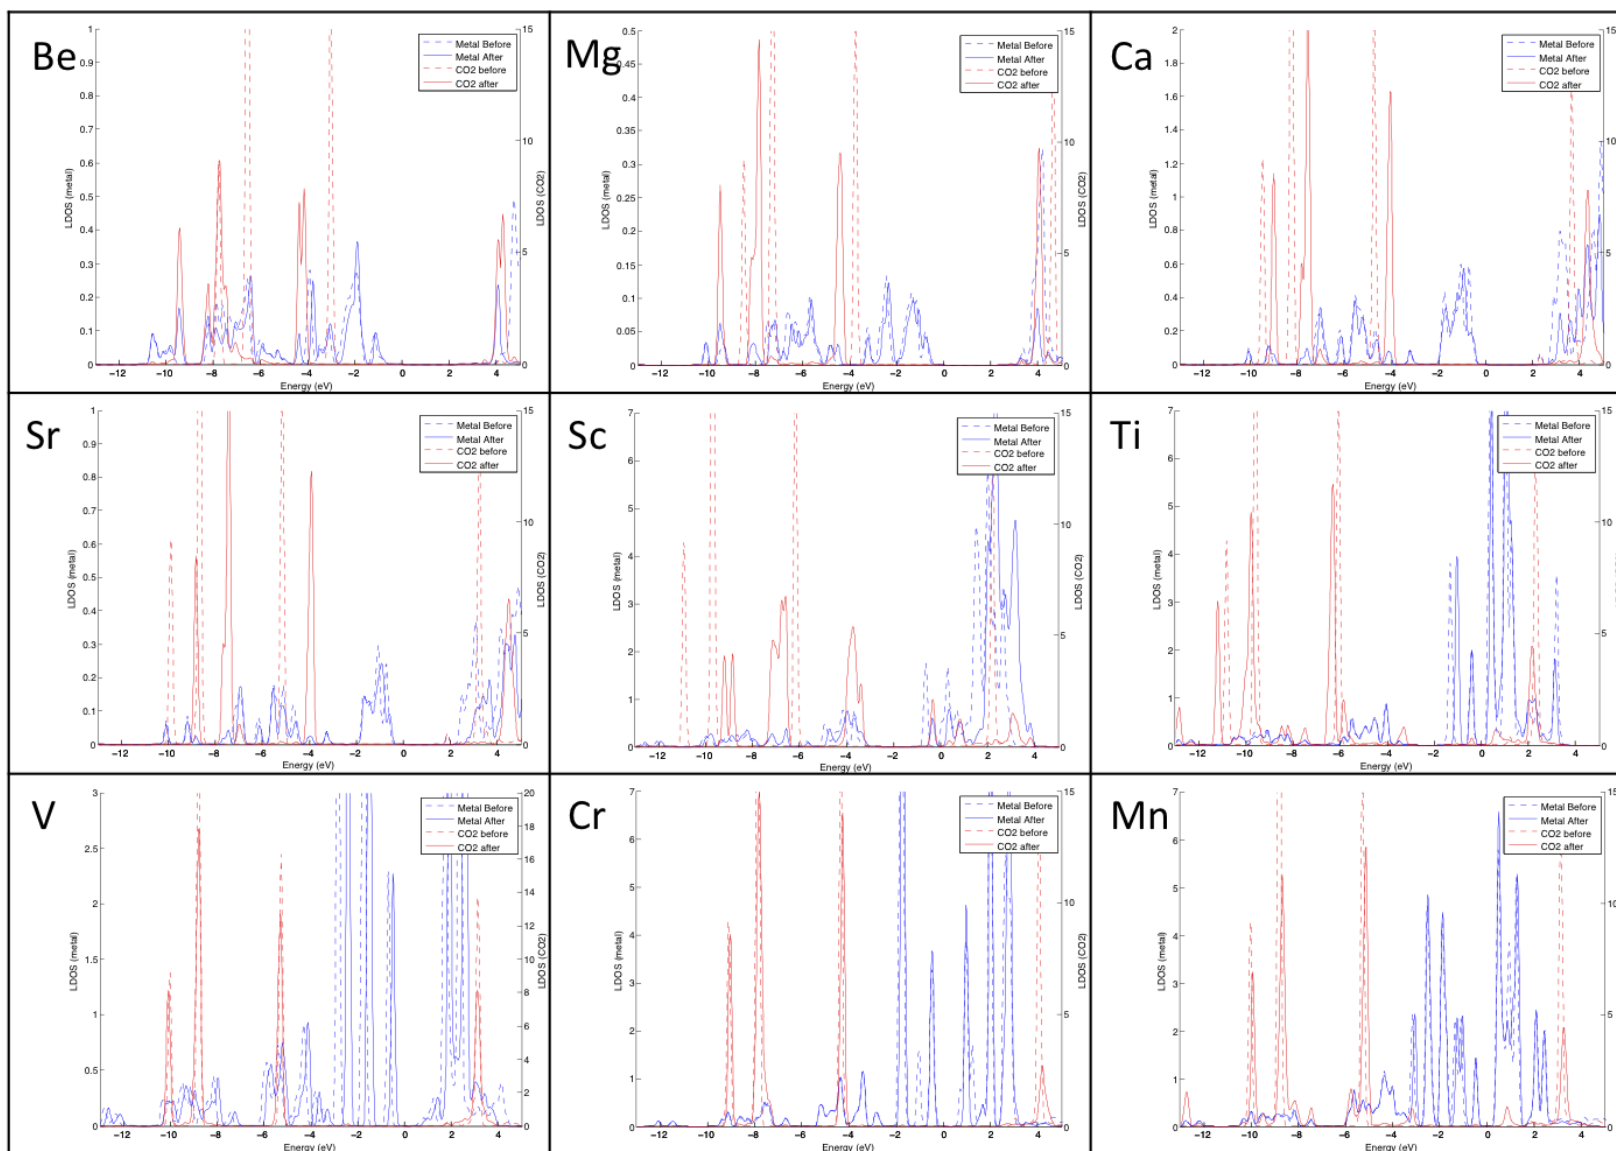

**Figure S9.** CO<sub>2</sub> and metal LDOS for M-HKSUT-1. (Fe, Co, Ni, Cu, Zn, Mo, W, Sn, and Pb)

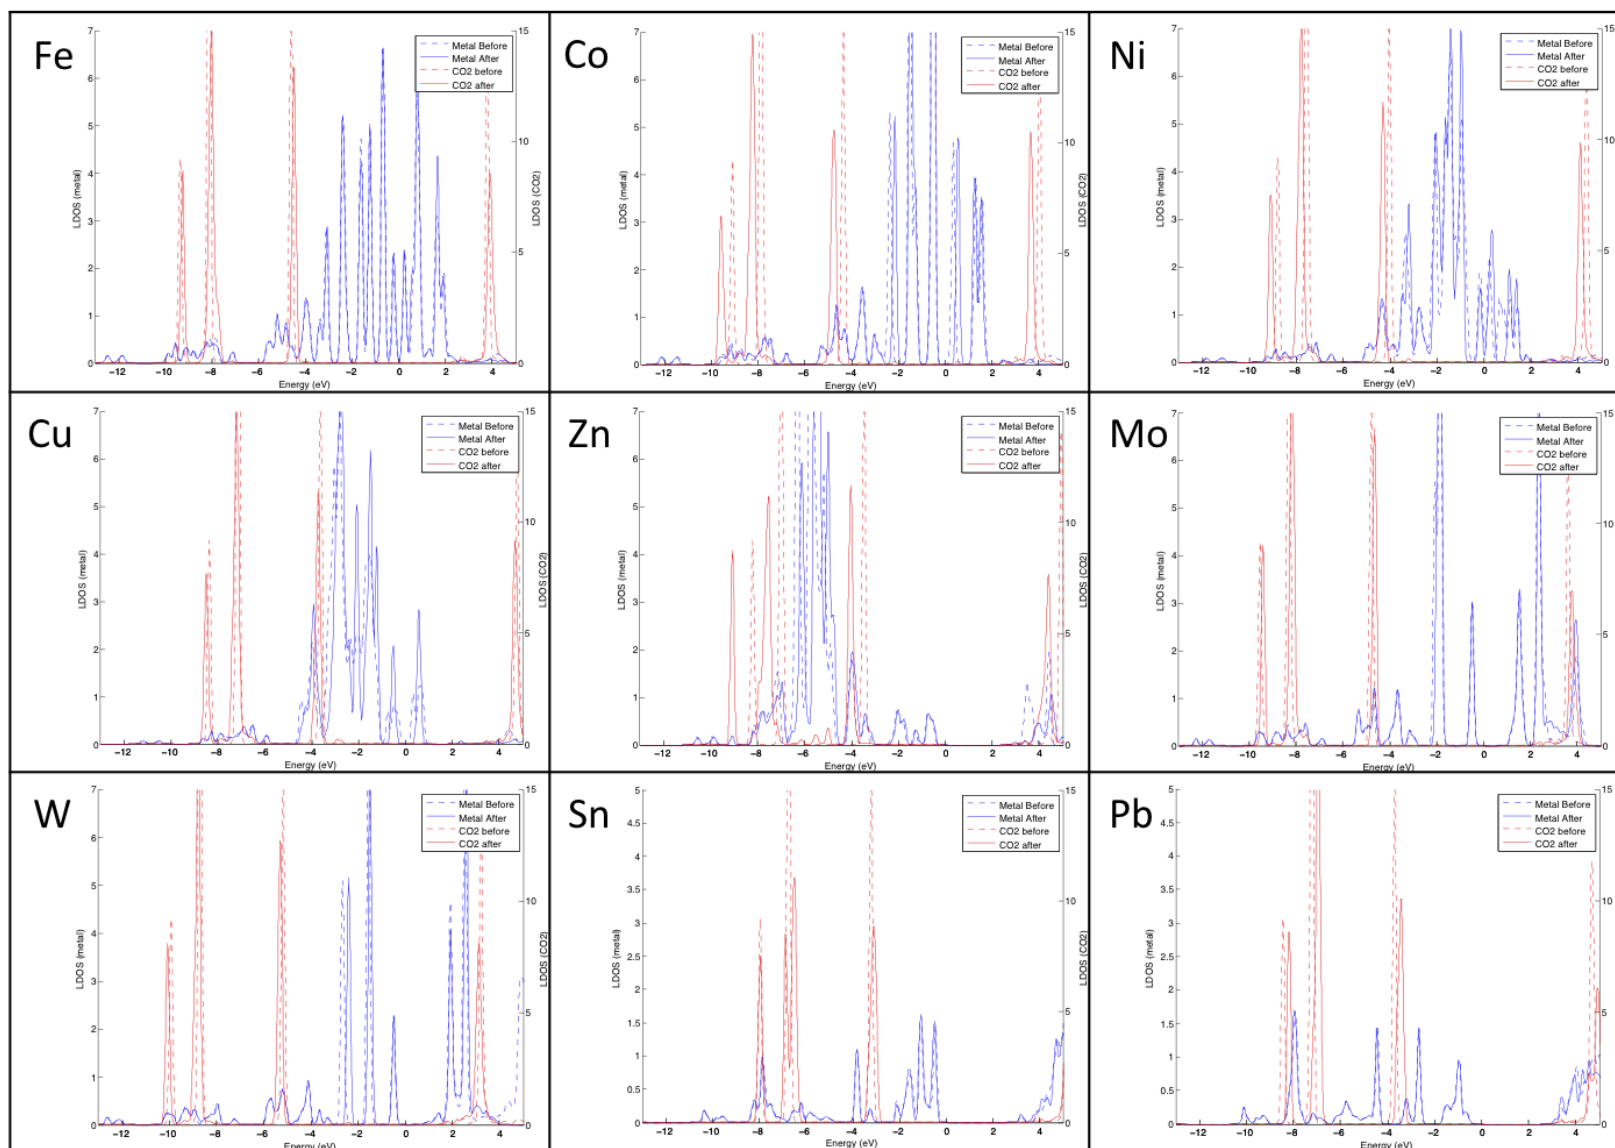



**Figure S10.** DOS projected to the metal site for transition metals in M-DOBDC and M-HKUST-1.

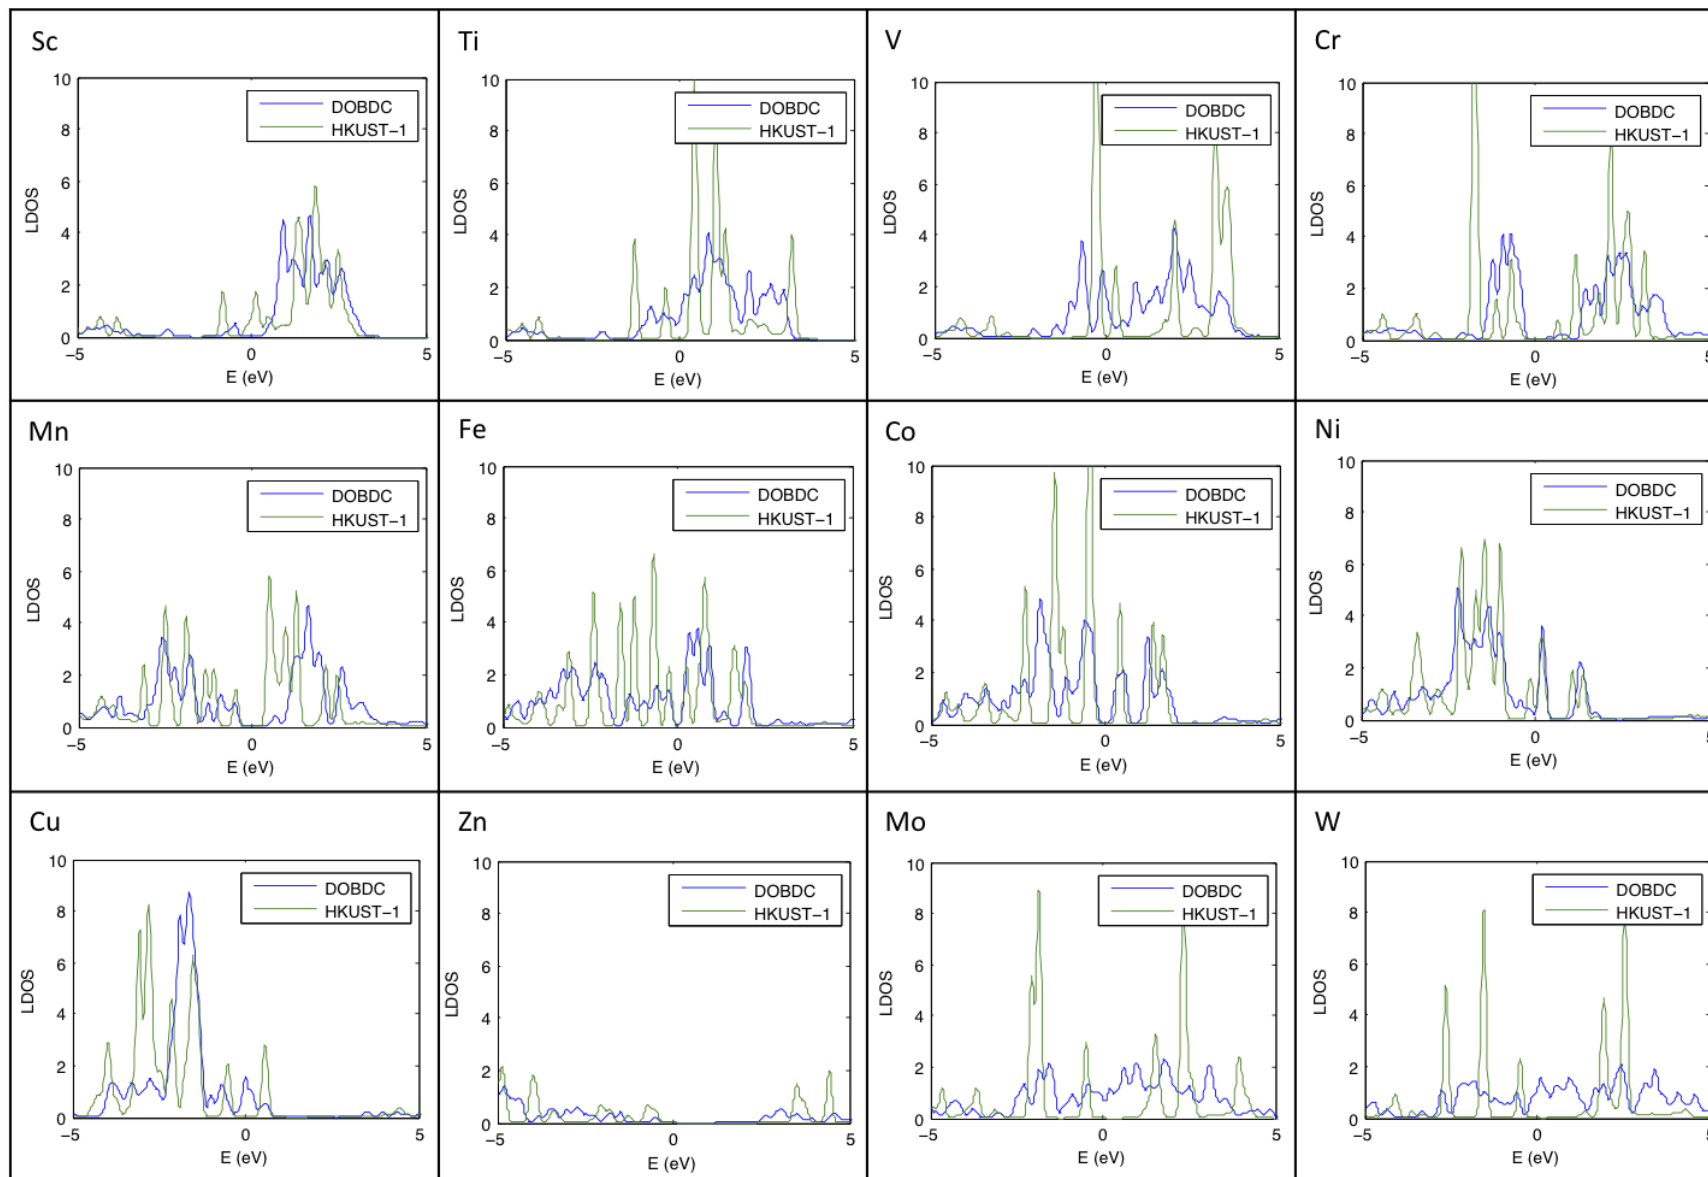

## Comment regarding the geometries and energetics for M = Sn and Pb

Sn protrudes from Sn-DOBDC and Sn-HKUST-1 in a similar fashion; consequently the binding energies of these MOFs are similar. The smaller protrusion of Sn in Sn-DOBDC allows CO<sub>2</sub> to simultaneously interact with the ligand (carboxyl group) to give stronger binding than Sn-HKUST-1. Moreover, larger protrusion of Sn from the MOF framework results in a slight change to the CO<sub>2</sub> binding mode incorporating multiple-site ligand-CO<sub>2</sub> interactions or CO<sub>2</sub>-CO<sub>2</sub> interactions. In Sn-DOBDC, CO<sub>2</sub> is closer to the carboxyl group and is complexed through its O atom to the C (carboxyl), with a C (carboxyl)-O<sub>CO2</sub> distance of 3.562 Å. This is smaller than the Sn-O<sub>CO2</sub> distance of 4.007 Å (table S5). In Sn-HKUST-1, the CO<sub>2</sub>-CO<sub>2</sub> interaction influences the adsorption process. This is suggested by the shorter C<sub>CO2</sub>-O<sub>CO2</sub> distance, 3.177 Å, compared to the metal-CO<sub>2</sub> distances. This results in a change to the CO<sub>2</sub> orientation where C<sub>CO2</sub> rather than O<sub>CO2</sub> is closer to the metal. The Sn-C<sub>CO2</sub> and Sn-O<sub>CO2</sub> distances are, respectively, 3.783 and 3.811 Å. Thus the four-fold CUS site in Sn-DOBDC and Sn-HKUST-1 influences CO<sub>2</sub> adsorption somewhat differently than in other metals. Behavior similar to the Sn-based compounds is found for Pb-DOBDC and Pb-HKUST-1.

## Reference

1. Caskey, S. R.; Wong-Foy, A. G.; Matzger, A. J., Dramatic Tuning of Carbon Dioxide Uptake via Metal Substitution in a Coordination Polymer with Cylindrical Pores. *J. Am. Chem. Soc.* **2008**, *130* (33), 10870-10871.
2. Zhou, W.; Wu, H.; Yildirim, T., *J. Am. Chem. Soc.* **2008**, *130*, 15268.
3. Bloch, E. D.; Murray, L. J.; Queen, W. L.; Chavan, S.; Maximoff, S. N.; Bigi, J. P.; Krishna, R.; Peterson, V. K.; Grandjean, F.; Long, G. J.; Smit, B.; Bordiga, S.; Brown, C. M.; Long, J. R., Selective Binding of O<sub>2</sub> over N<sub>2</sub> in a Redox-Active Metal-Organic Framework with Open Iron(II) Coordination Sites. *J. Am. Chem. Soc.* **2011**, *133* (37), 14814-14822.
4. Dietzel, P. D. C.; Morita, Y.; Blom, R.; Fjellvåg, H., *Angew. Chem., Int. Ed.* **2005**, *44*, 6354.
5. Dietzel, P. D. C.; Panella, B.; Hirscher, M.; Blom, R.; Fjellvåg, H., *Chem. Commun.* **2006**, 959.
6. Sanz, R.; Martinez, F.; Orcajo, G.; Wojtas, L.; Briones, D., Synthesis of a honeycomb-like Cu-based metal-organic framework and its carbon dioxide adsorption behaviour. *Dalton Trans.* **2013**, *42* (7), 2392-2398.
7. Rosi, N. L.; Kim, J.; Eddaoudi, M.; Chen, B.; O'Keeffe, M.; Yaghi, O. M., Rod Packings and Metal-Organic Frameworks Constructed from Rod-Shaped Secondary Building Units. *J. Am. Chem. Soc.* **2005**, *127* (5), 1504-1518.
8. Murray, L. J.; Dinca, M.; Yano, J.; Chavan, S.; Bordiga, S.; Brown, C. M.; Long, J. R., Highly-Selective and Reversible O<sub>2</sub> Binding in Cr<sub>3</sub>(1,3,5-benzenetricarboxylate)<sub>2</sub>. *J. Am. Chem. Soc.* **2010**, *132* (23), 7856-7857.
9. Maniam, P.; Stock, N., Investigation of Porous Ni-Based Metal-Organic Frameworks Containing Paddle-Wheel Type Inorganic Building Units via High-Throughput Methods. *Inorg. Chem.* **2011**, *50* (11), 5085-5097.
10. Chui, S. S.-Y.; Lo, S. M.-F.; Charmant, J. P. H.; Orpen, A. G.; Williams, I. D., A Chemically Functionalizable Nanoporous Material [Cu<sub>3</sub>(TMA)<sub>2</sub>(H<sub>2</sub>O)<sub>3</sub>]<sub>n</sub>. *Sci* **1999**, *283* (5405), 1148-1150.
11. Feldblyum, J. I.; Liu, M.; Gidley, D. W.; Matzger, A. J., Reconciling the Discrepancies between Crystallographic Porosity and Guest Access As Exemplified by Zn-HKUST-1. *J. Am. Chem. Soc.* **2011**, *133* (45), 18257-18263.
12. Kramer, M.; Schwarz, U.; Kaskel, S., Synthesis and properties of the metal-organic framework Mo<sub>3</sub>(BTC)<sub>2</sub> (TUDMOF-1). *J. Mater. Chem.* **2006**, *16* (23), 2245-2248.
13. Shannon, R. D., Revised effective ionic radii and systematic studies of interatomic distances in halides and chalcogenides. *Acta Cryst.* **1976**, *32* (5), 751-767.
14. Pauling, L., *The Nature of the Chemical Bond: An Introduction to Modern Structural Chemistry*. Cornell Univ: 1960.
15. Ahrens, L. H., The use of ionization potentials Part 1. Ionic radii of the elements. *Geochim. Cosmochim. Acta* **1952**, *2* (3), 155-169.
